# Supplementary material for: High performance ultrascaled monolayer/bilayer WSe2 FETs achieved by immaculate 2D/2D contacts
Source: Research Square preprint supplement (doi:10.21203/rs.3.rs-5538514/v1), 2024-12-20
Supplement: Supplementary file 1 [file 1336fdb62fef5ab178b15543.docx]

**Supplementary Note 1. SEM image of etched Nb0.3W0.7Se2 contact bars**


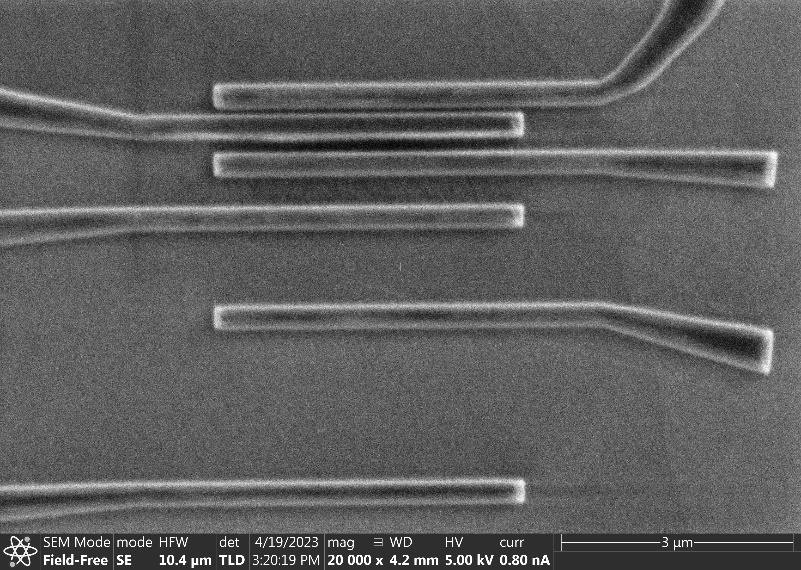


Figure S1 A SEM image of etched Nb0.3W0.7Se2 contact bars on 90nm SiO2

**Supplementary Note 2. Detailed fabrication process for 2D/2D contacts on different substrates**


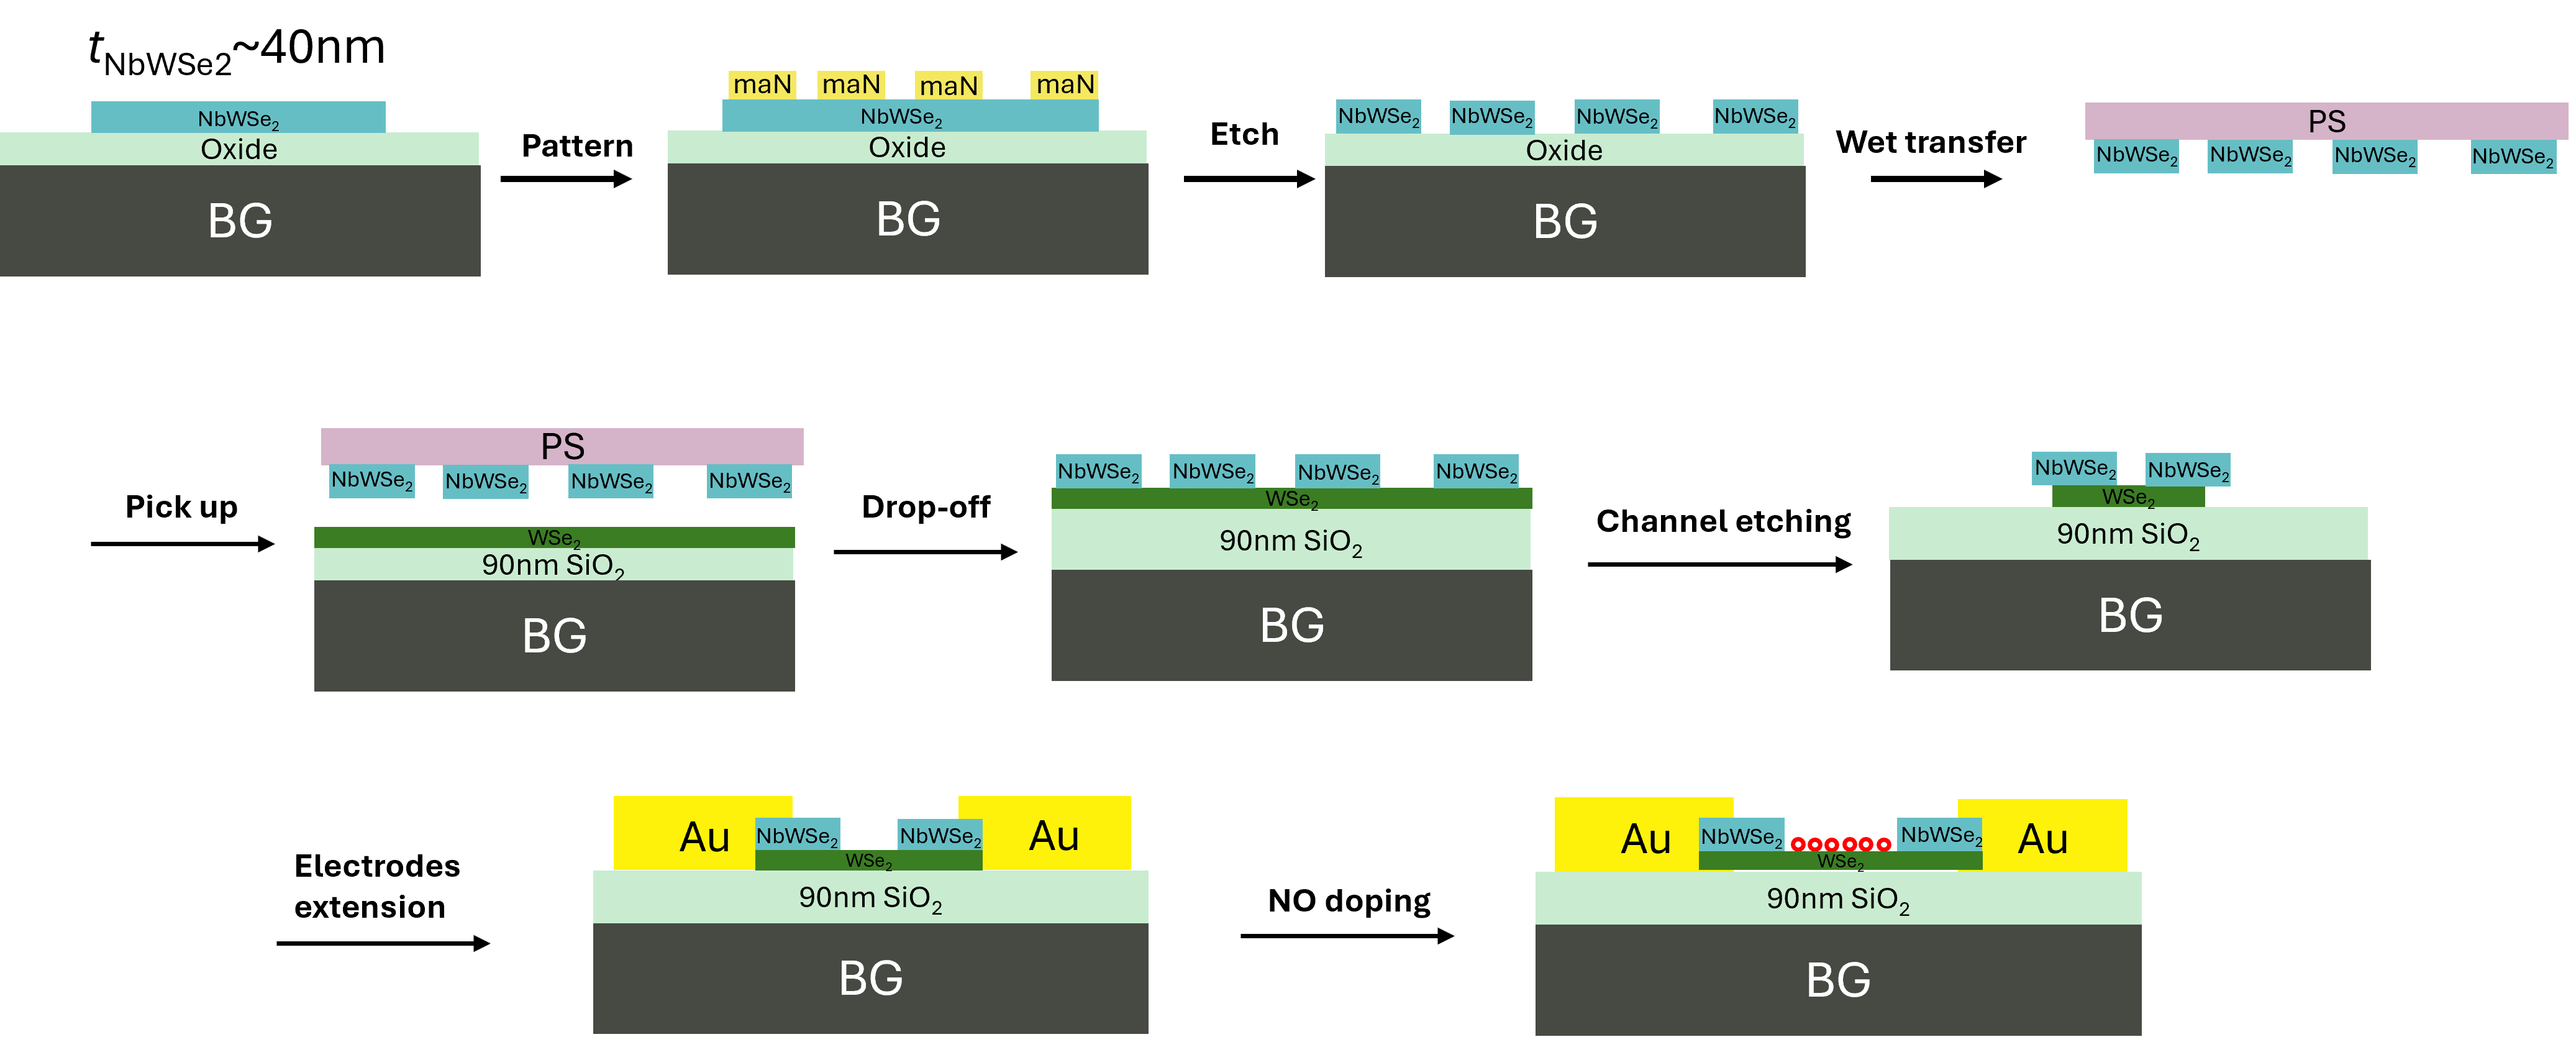


Figure S2 Fabrication process for 2D/2D contacts on 90nm SiO2/Si substrates.


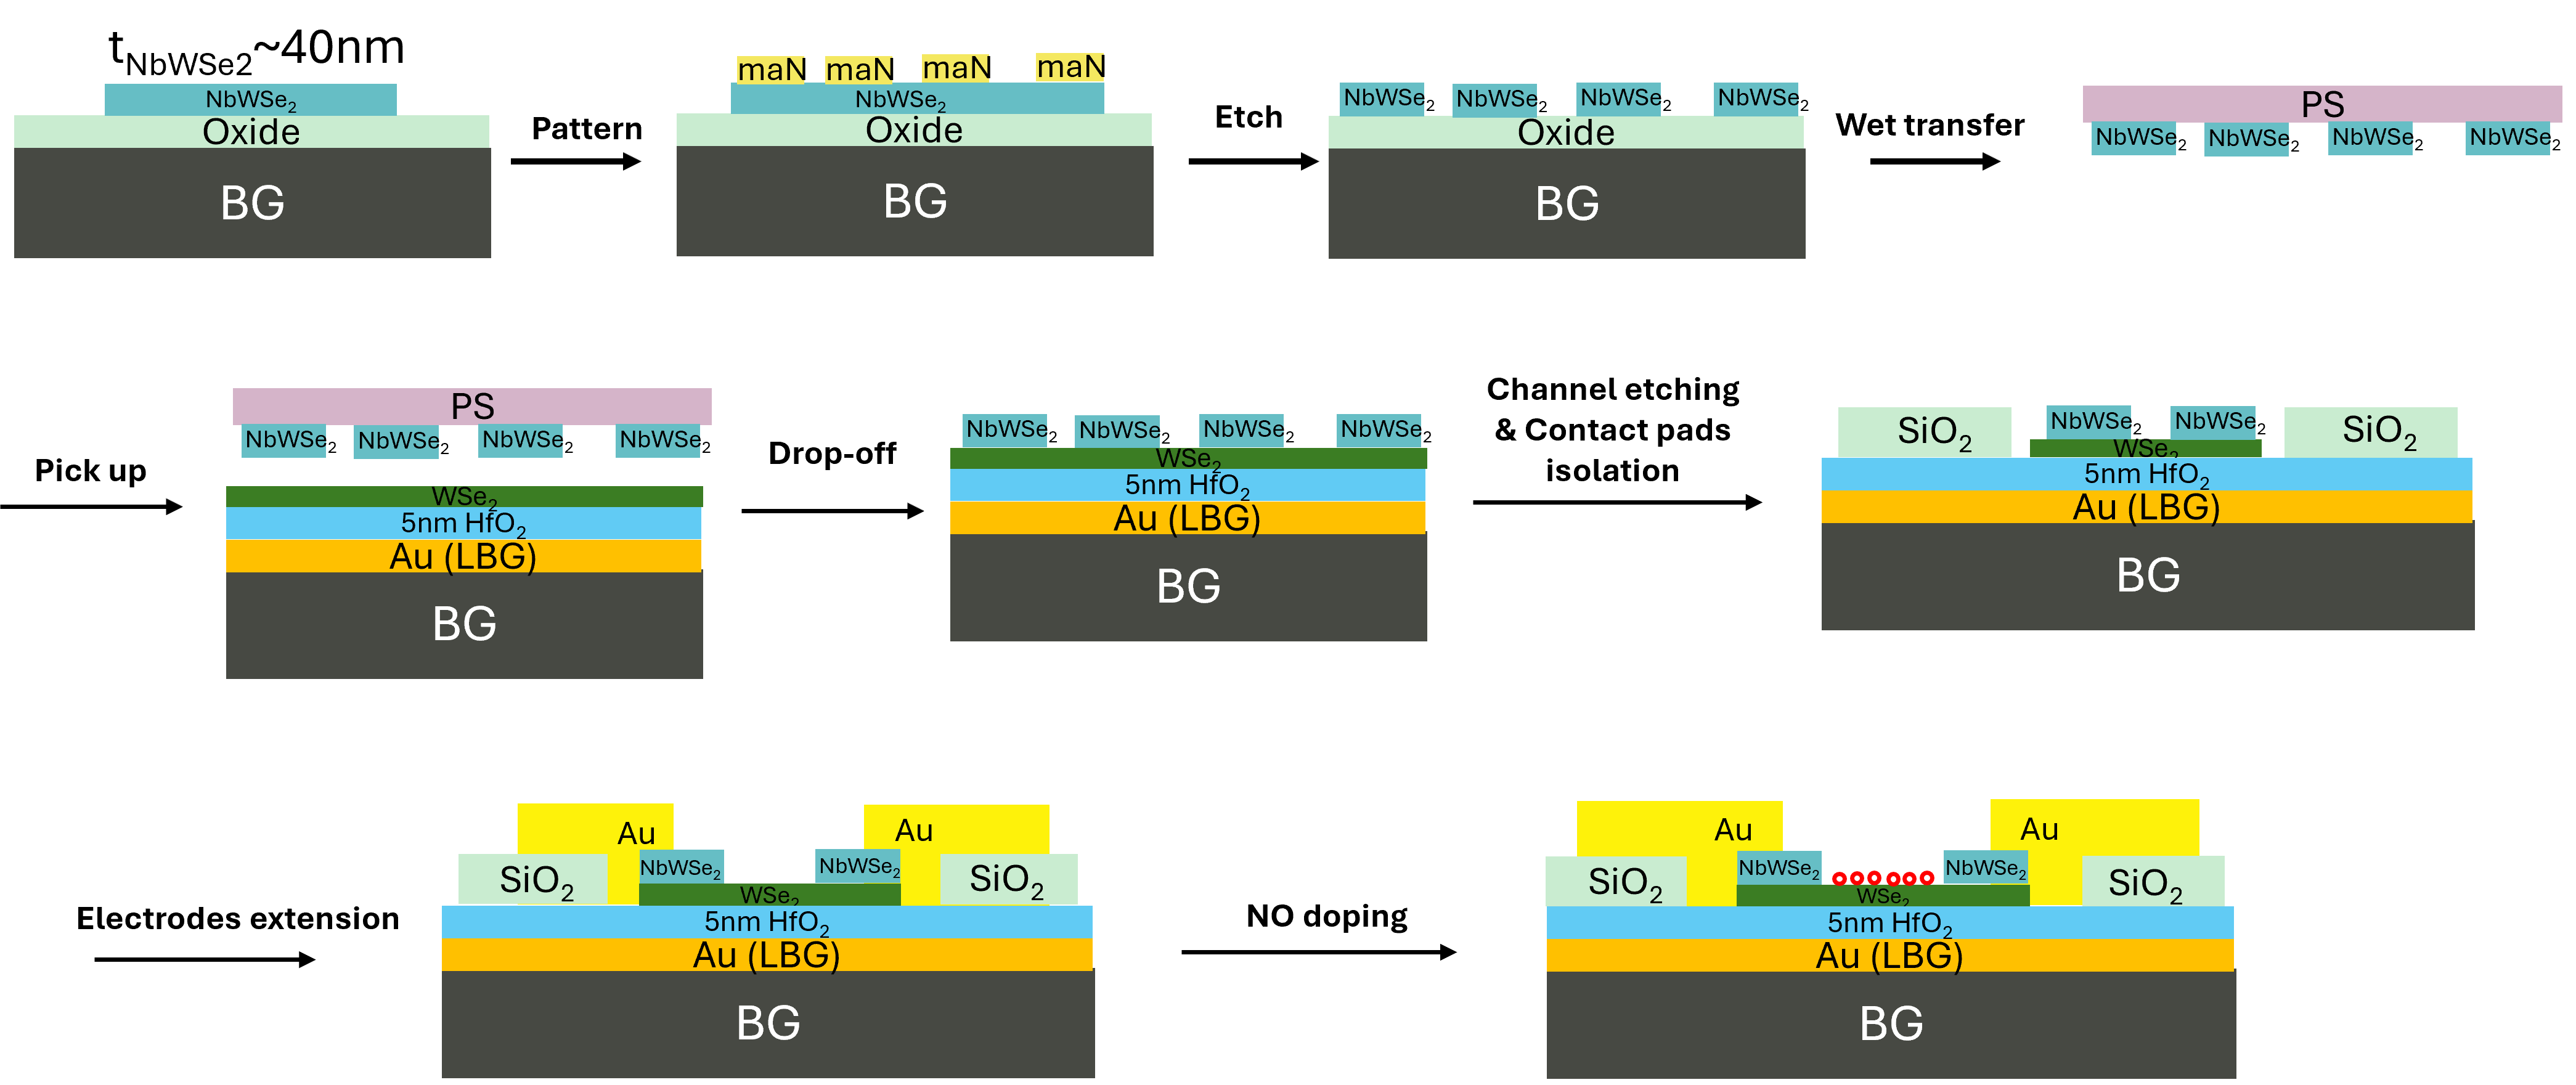


Figure S3 Fabrication process for 2D/2D contacts on 5nm HfO2 substrates.


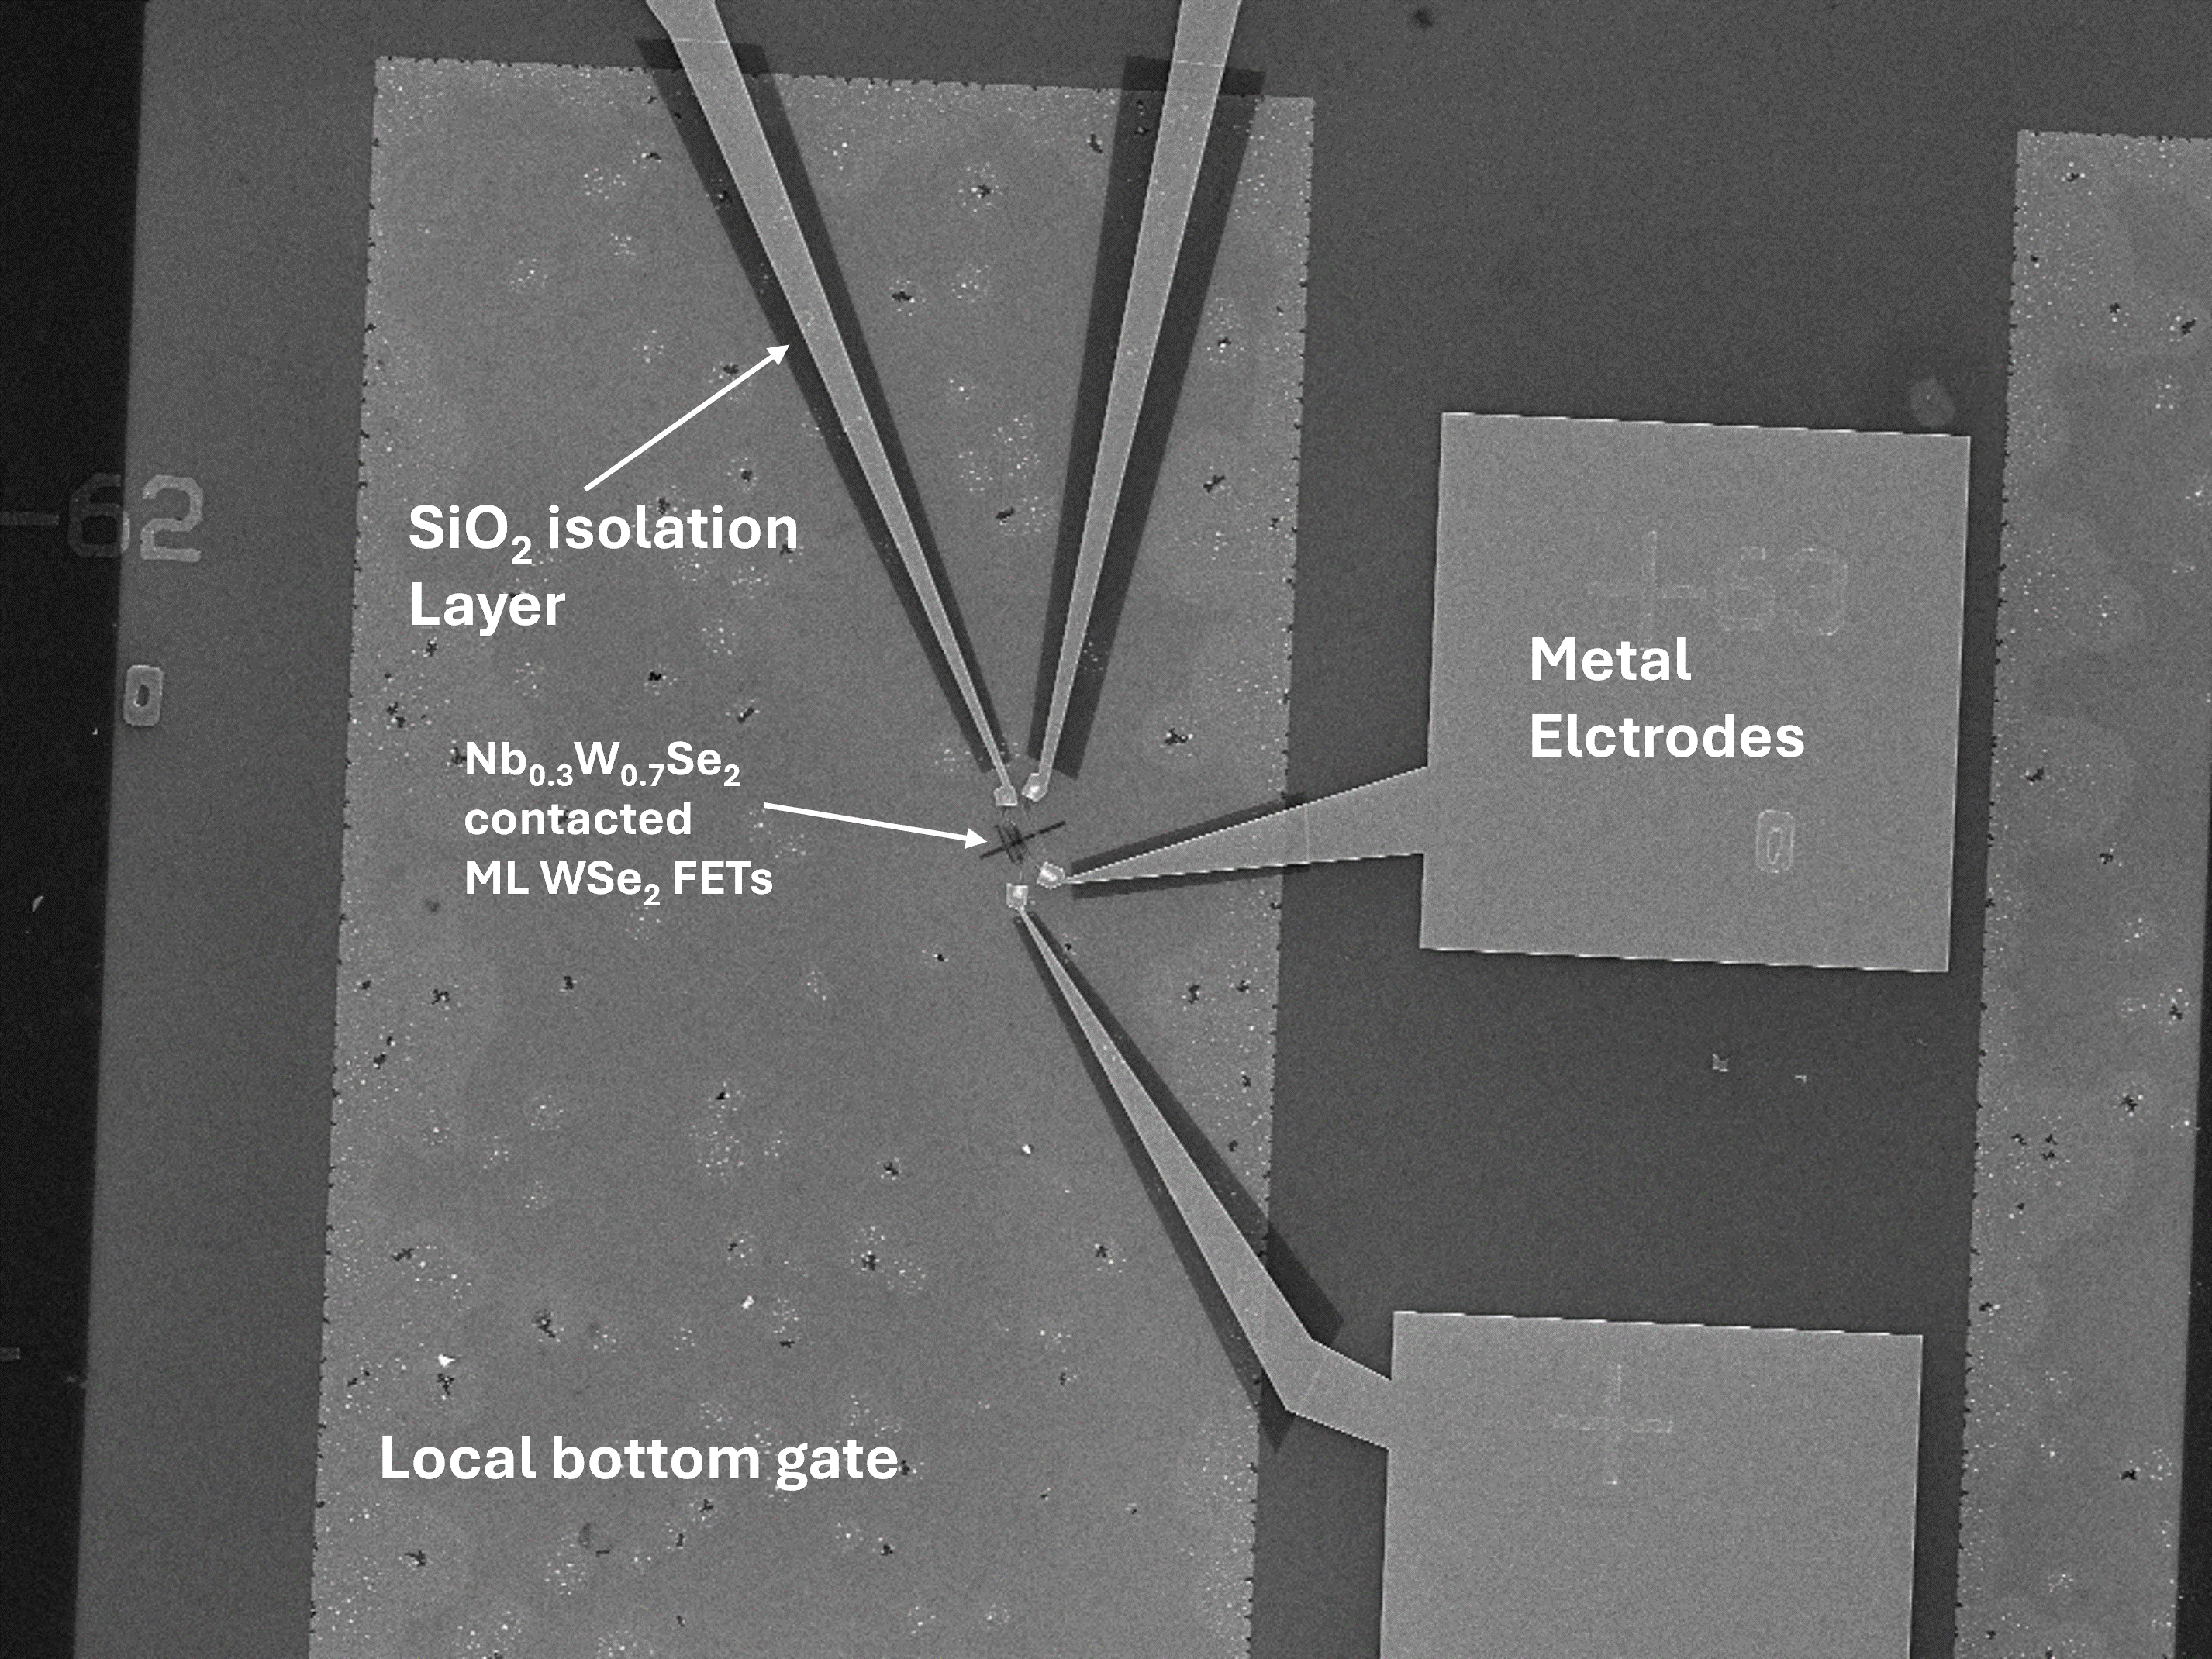


Figure S4 An SEM image of Nb0.3W0.7Se2 contacted ML WSe2 on local bottom gate (5nm HfO2/Au/p++ Si)

**Supplementary Note 3. Electrical characterization of NbxW1-xSe2 with different thicknesses**


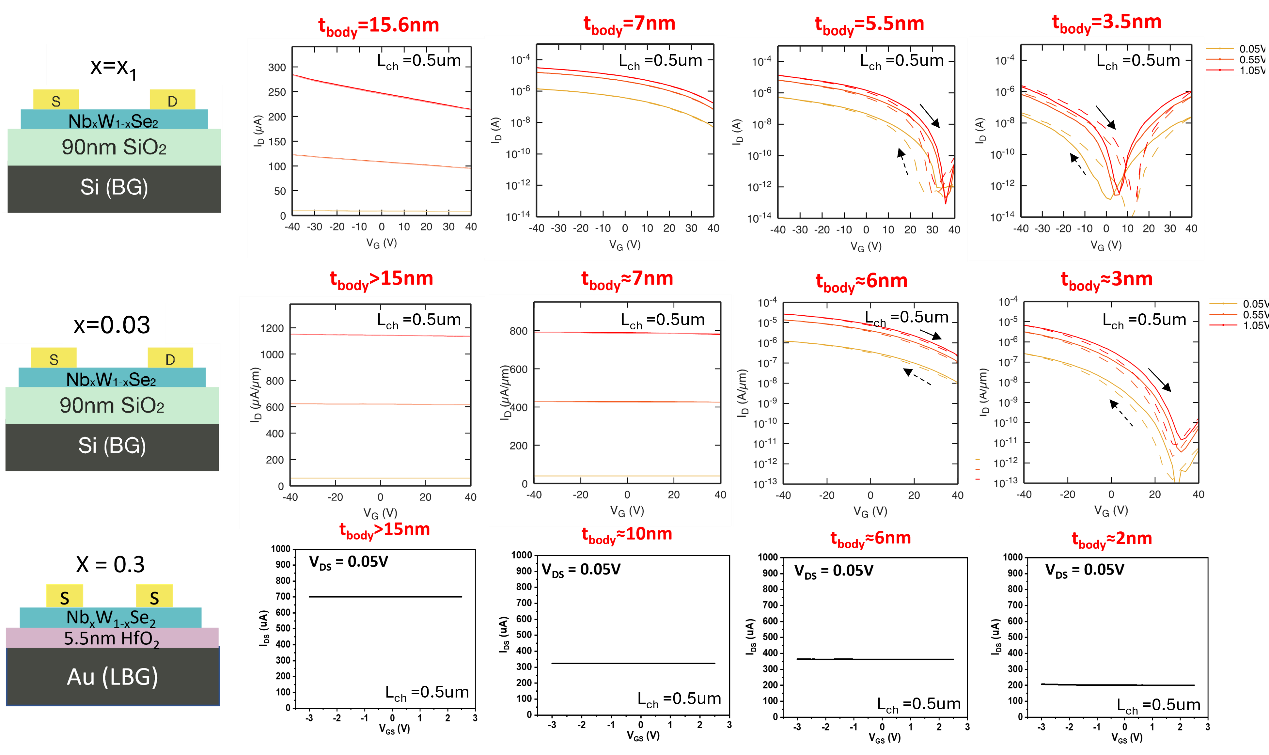


Figure S5 Transfer curves of mechanically exfoliated NbxW1-xSe2 flakes of varied composition from x=x1 to x=0.03 and x=0.3 with different thicknesses,. The sample labeled Nbx1W1-x1 Se2 had a near-zero Nb concentration, undetectable by EDX as described in the materials growth part of the Method section.


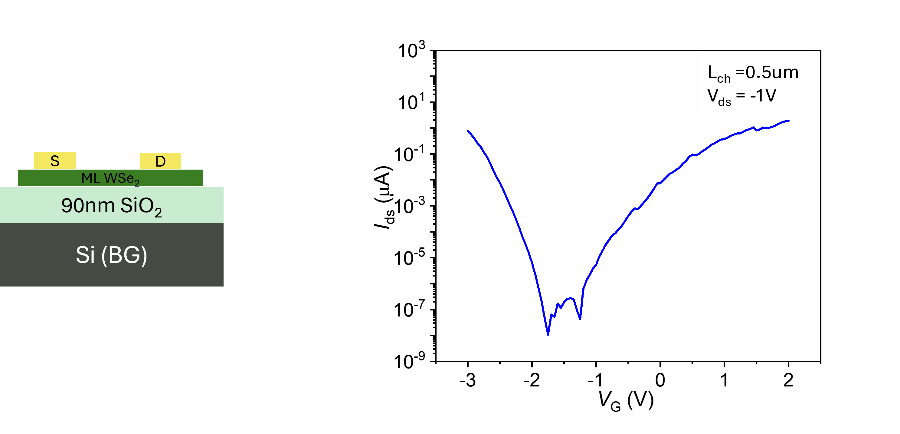


Figure S6 Exemplary transfer curve of a ML WSe2 FET.

**Supplementary Note 4. Device variability for 2D/2D contacted ML FETs on 90nm SiO2 substrates**


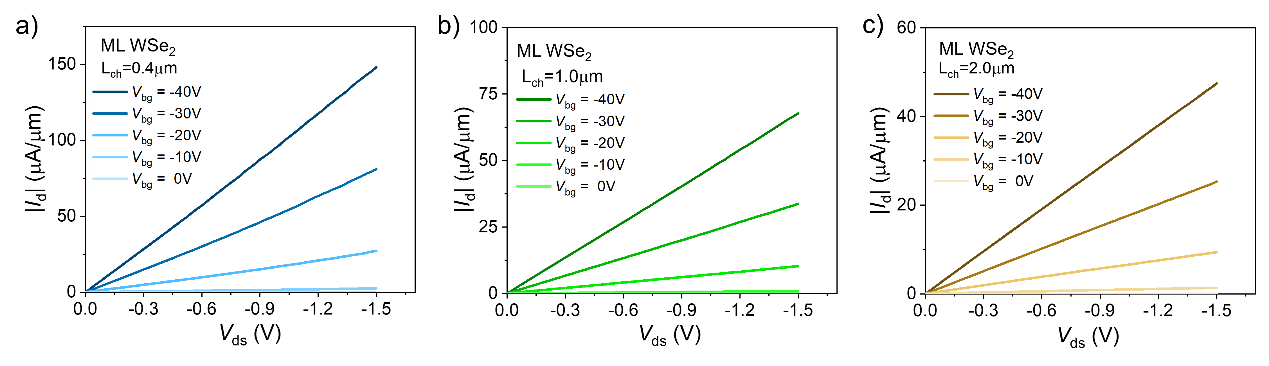
Figure S7 Transfer curves of three different sets of 2D/2D contacted ML FETs on 90nm SiO2 substrates. a), b), and c) each include characteristics for different channel length FETs.


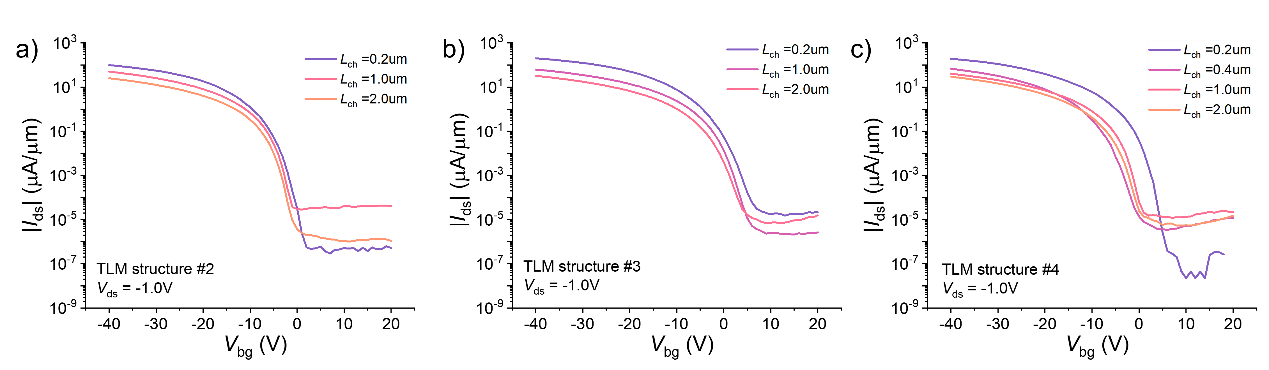
Figure S8 Transfer curves of three different sets of 2D/2D contacted ML FETs on 90nm SiO2 substrates. a), b), and c) each include characteristics for different channel length FETs.


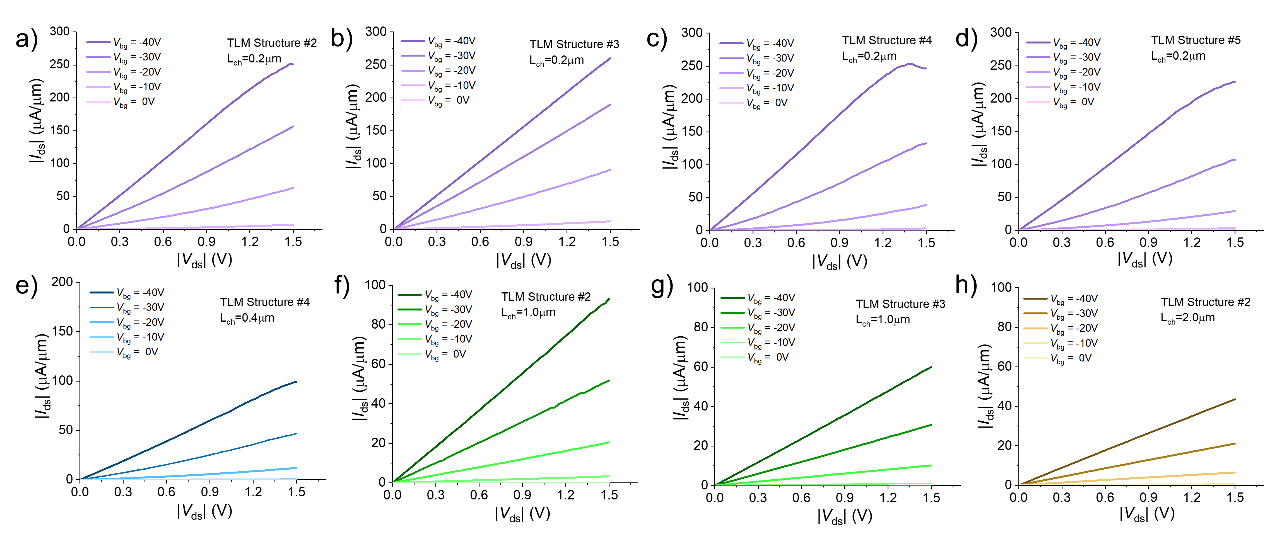
Figure S9 Output characteristics for 2D/2D contacted ML FETs on 90nm SiO2 substrates with different channel lengths beyond those presented in the main text.


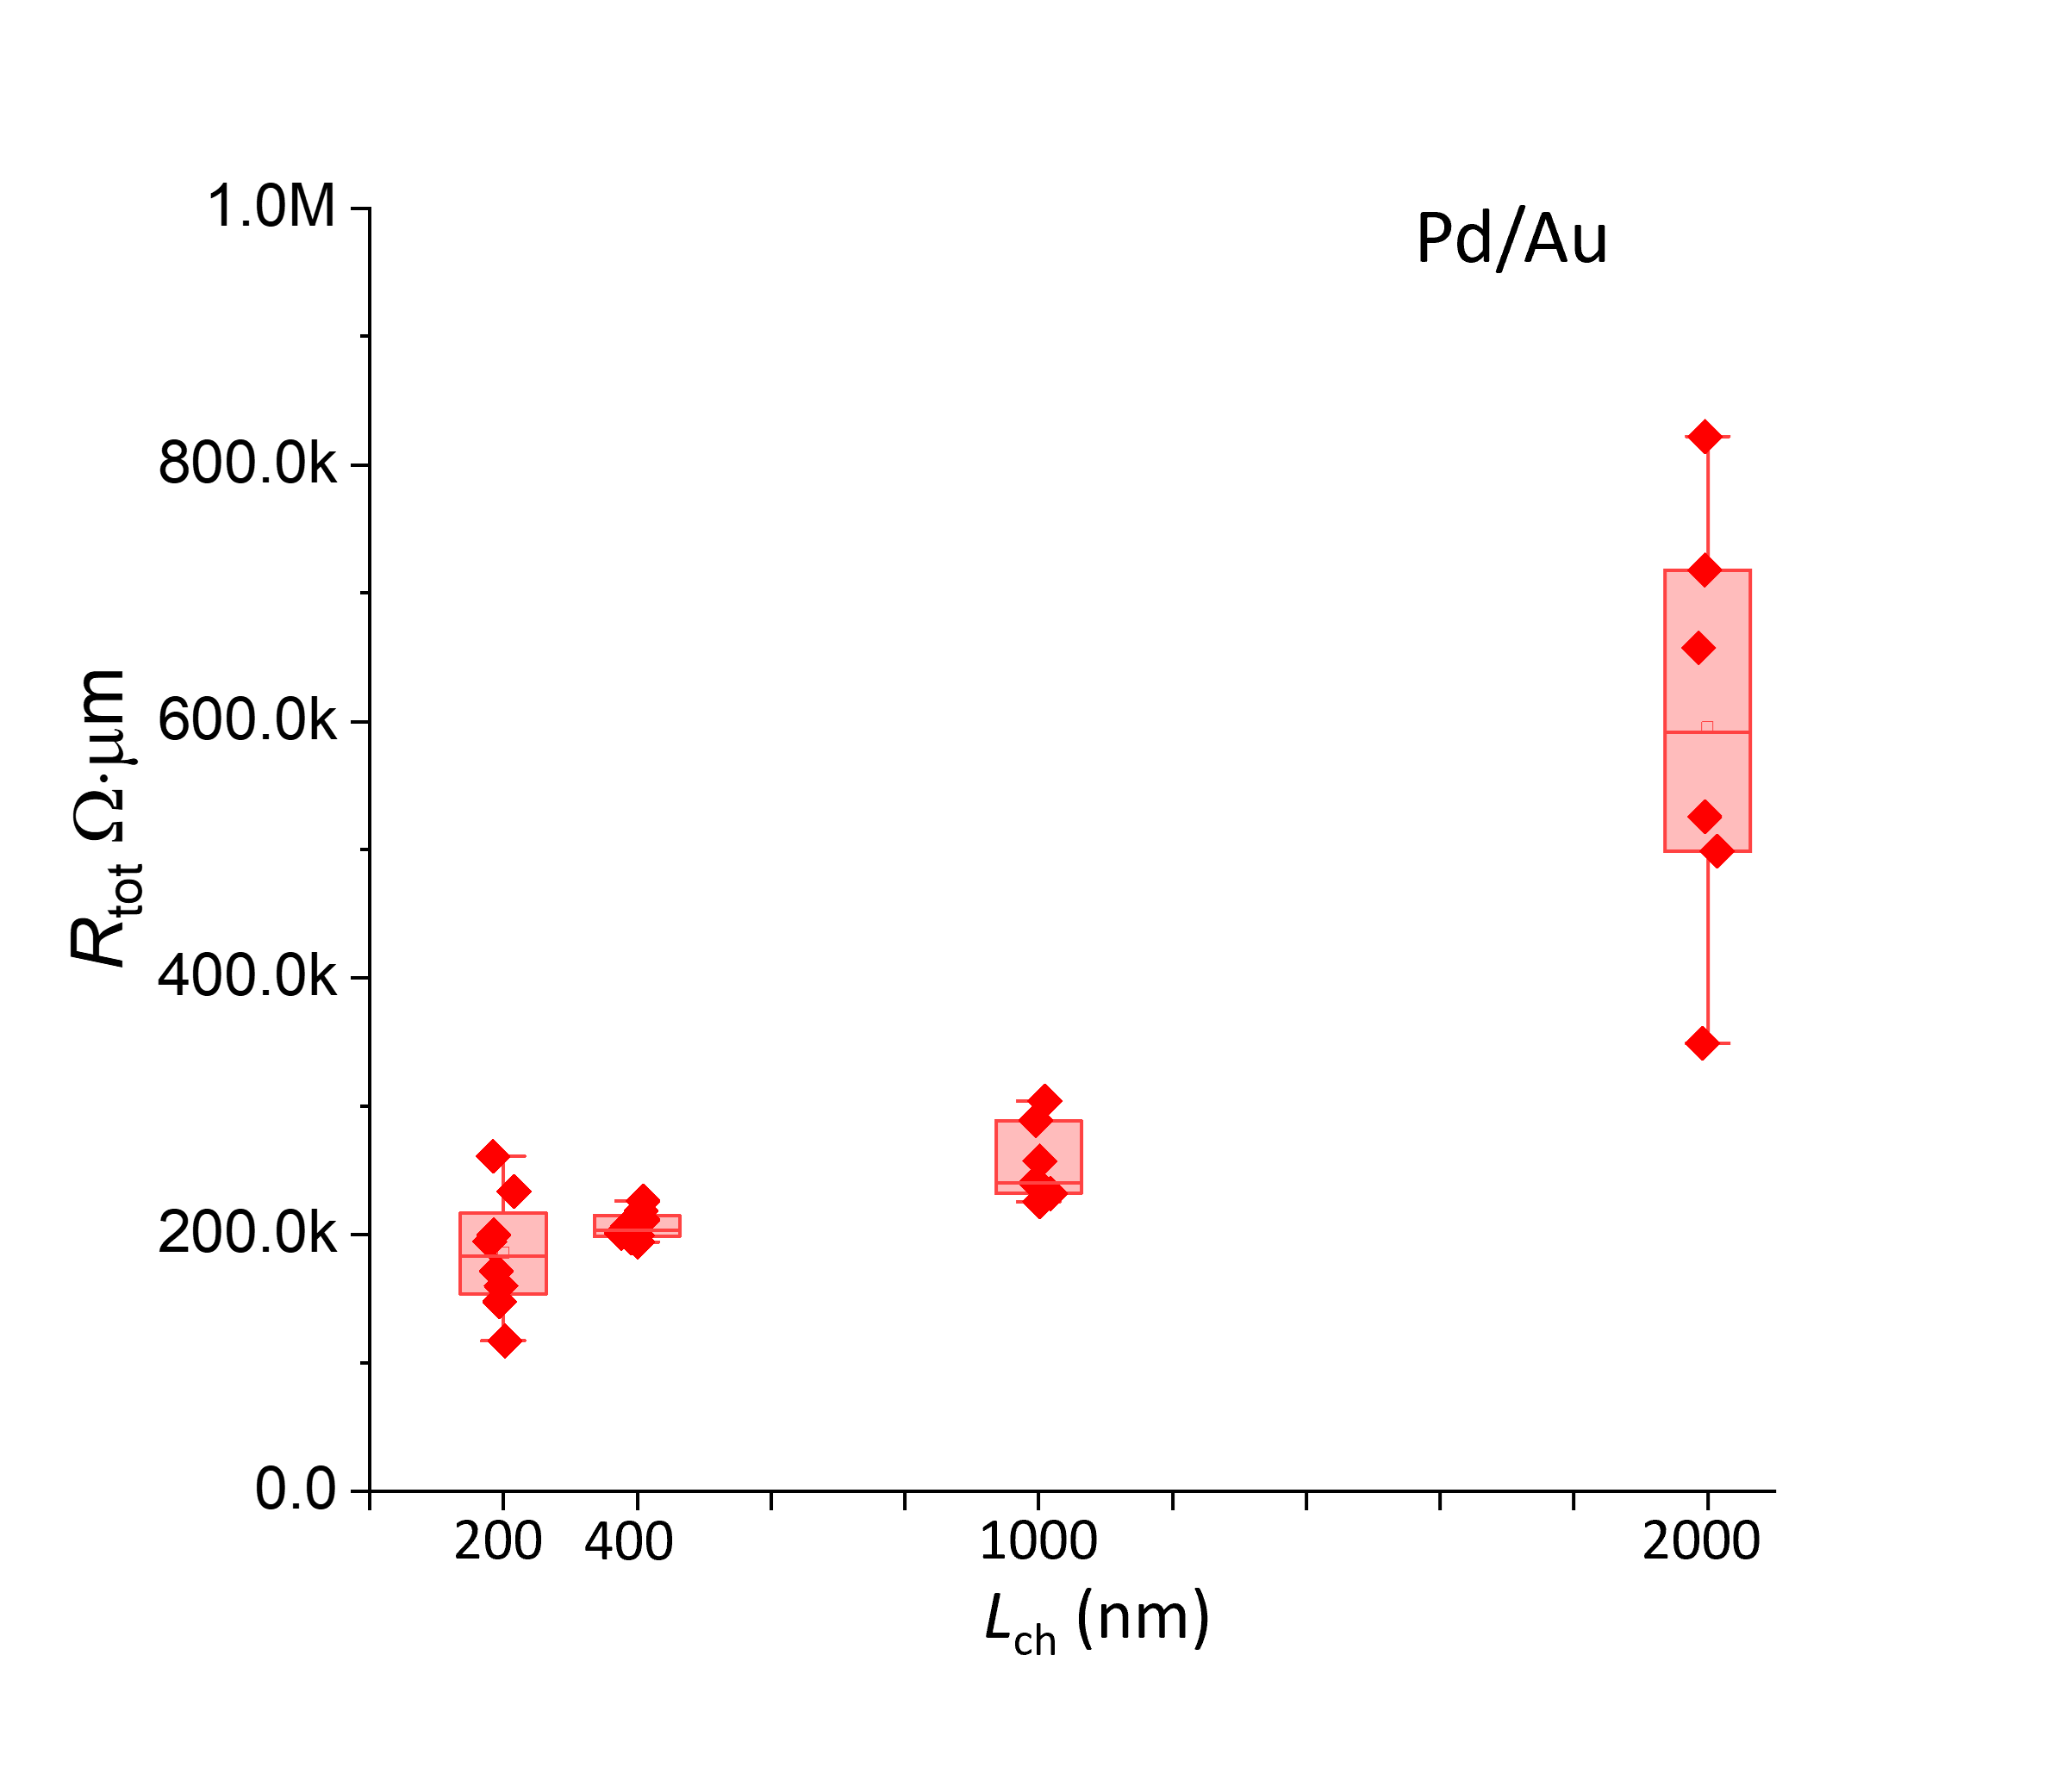


Figure S10 Total resistance versus channel length at Vbg = -60V for Pd/Au contacted devices with different channel lengths.


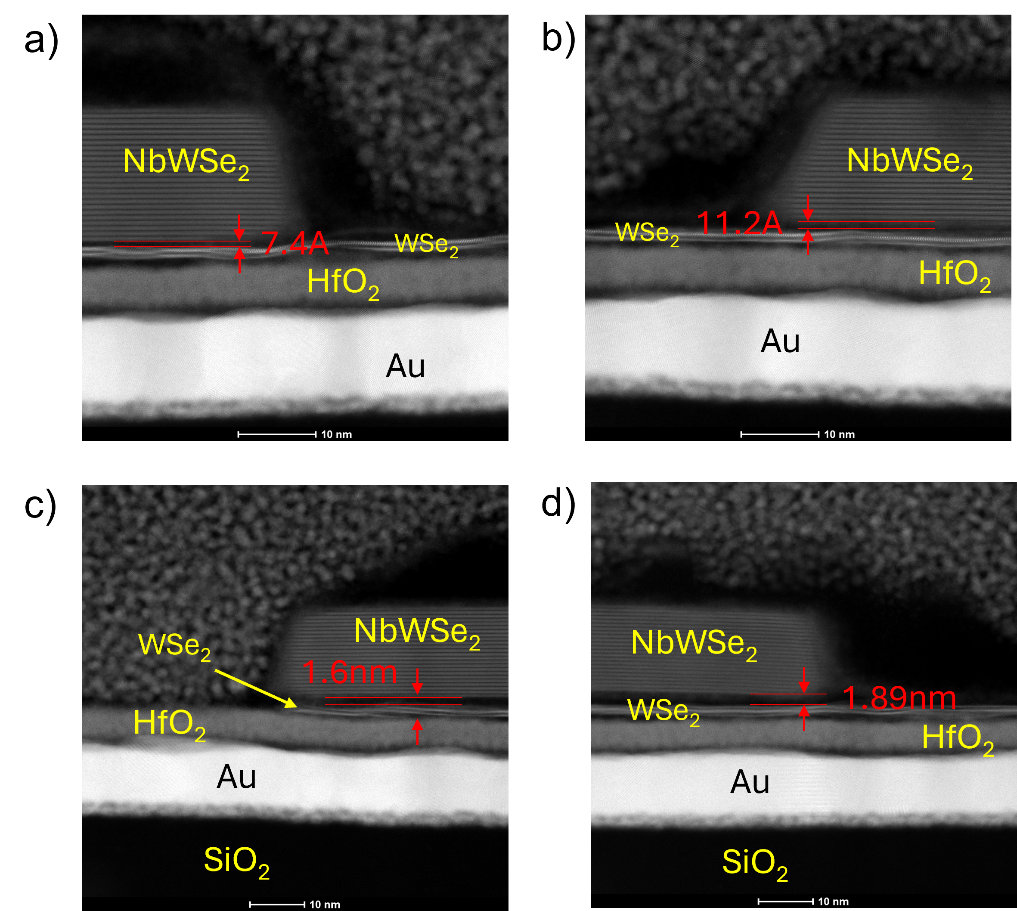


Figure S11 Cross-sectional STEM image of Nb0.3W0.7Se2 contacted WSe2 FETs on 5nm HfO2/Au substrate


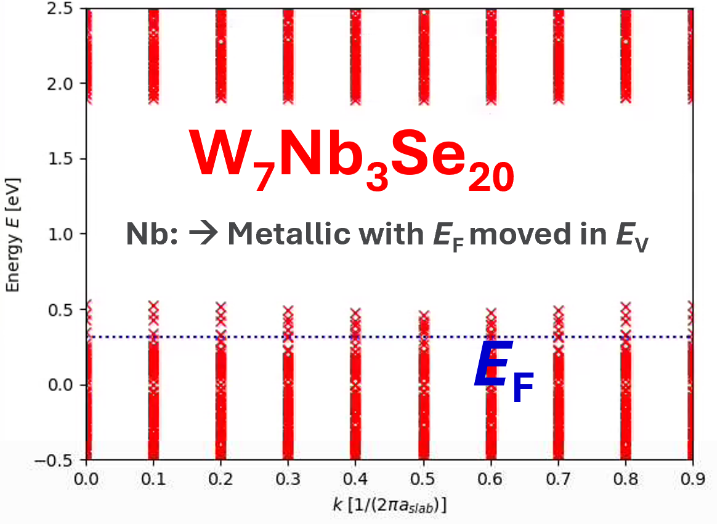


Figure S12 The DFT result of Nb0.3W0.7Se2. The fermi level of Nb0.3W0.7Se2 moves in to valence band, indicating a metallic property.


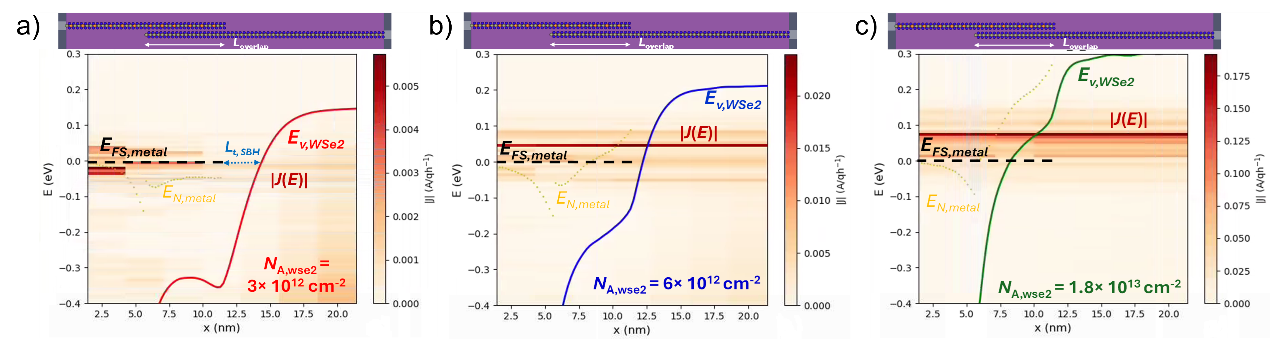


Figure S13 DFT-NEGF-simulated spectral current (in absolute units), |*J*(E)|, along the transport direction (x) in the NbWSe2/WSe2 heterostructureofFigure 4c for different NA,WSe2 doping concentrations in the WSe2­ bottom layer a) NA,WSe2 = 3×1012 cm-2, b) NA,WSe2 = 6×1012 cm-2, and c) NA,WSe2 = 1.8×1013 cm-2. The valence band in the WSe2 layer, *E*V,WSe2, as well as, the source Fermi level in the NbWSe2 metalic region (black dotted line), *E*FS,metal, are also indicated. The x-distance between the end of the *E*FS,metal line and the *E*V,WSe2  line in the vicinity of the source Fermi level *L*t,SBH is indicated with a blue arrow in Figure S12a. *L*t,SBH represents an estimate of the carrier tunneling distance through the Schottky barrier. As *N*A,Wse2 is increased, this distance is strongly reduced (Figure S12b), or vanishes (Figure S12c), i.e., the carriers feel an increasingly transparent Schottky barrier when crossing from the edge of the metal layer to the WSe2 layer. Finally, the position of the neutrality level, *E*N,metal, i.e., the equilibrium DFT- Fermi-level moved by the self-consistent potential in the metal layer is also shown, as well as a schematic view of the device, with the top metal and bottom WSe2 positions in the x-direction matching those of the spectral plot. *V*DS = -0.15V.

Figure S14 Contact resistance versus carrier density of WSe2/Nb0.3W0.7Se2 heterostructures with different layers of WSe2 or NbWSe2 in AA and AA’ stacking. The number of layers is indicated in the figure with the first (second) number being the number of WSe2 (respectively Nb0.3W0.7Se2) layers. An additional ’ is added for a AA’ stacking. The Schottky barrier heighs of the corresponding heterostructures are shown in Figure 4h.


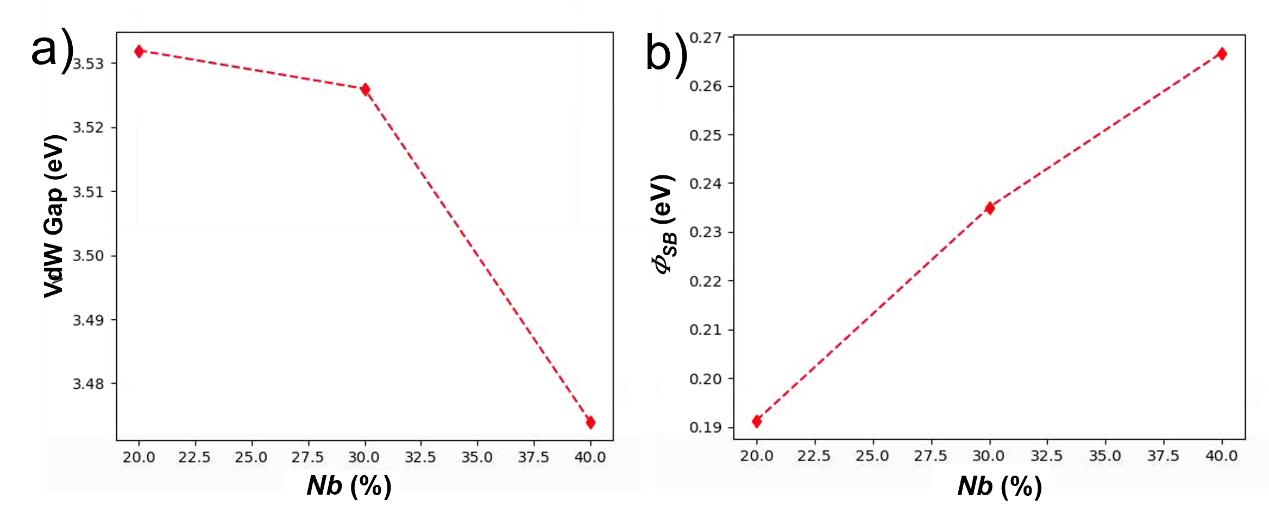


Figure S15 **a.** vdW gap for varying Nb-content for the AA stacking. **b.** Schottky barrier height of the heterostructure of NbxW1-xSe2/WSe2 for different Nb concentrations, x=0.2, 0.3, 0.4 or the AA stacking.


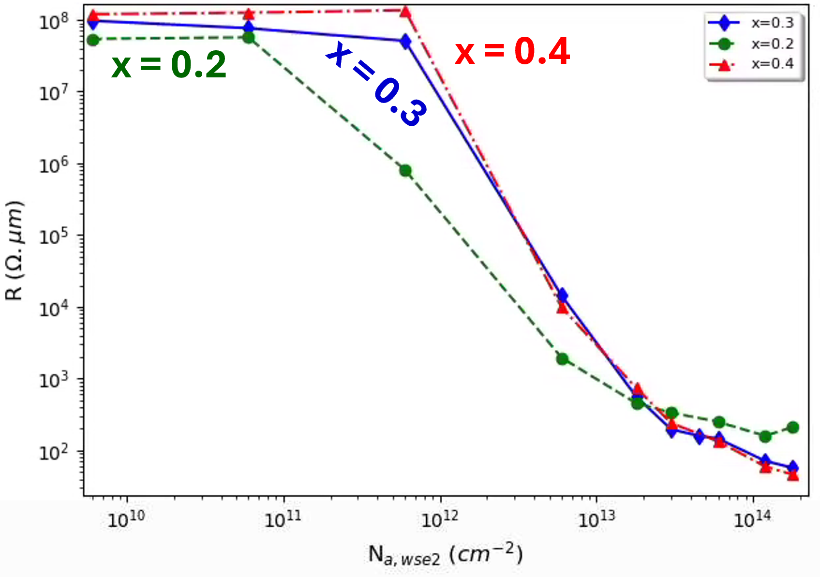


Figure S16 Contact resistance versus carrier density for different Nb concentrations x in of NbxW1-xSe2 alloys.
